# Supplementary material for: Comparative Genomics of the Extreme Acidophile Acidithiobacillus thiooxidans Reveals Intraspecific Divergence and Niche Adaptation
Source: MDPI journal article supplement (doi:10.3390/ijms17081355), 2016-08-19
Supplement: s1 [file s1]

# Supplementary Materials: Comparative Genomics of the Extreme Acidophile *Acidithiobacillus thiooxidans* Reveals Intraspecific Divergence and Niche Adaptation

Xian Zhang, Xue Feng, Jiemeng Tao, Liyuan Ma, Yunhua Xiao, Yili Liang, Xueduan Liu and Huaqun Yin

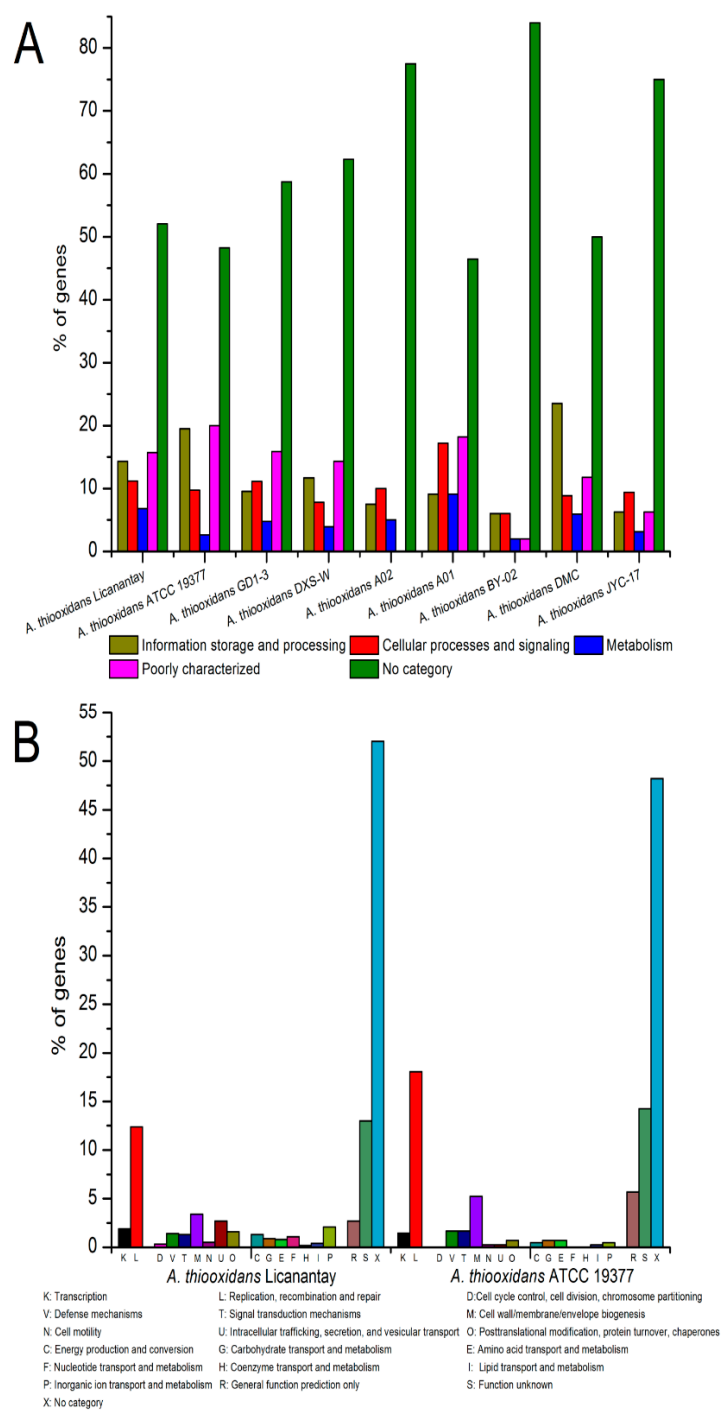

**Figure S1.** Classification of strain-specific genes in *A. thiooxidans* strains. Coding sequences (CDSs) were assigned to the Clusters of Orthologous Groups (COG) super-functional category (A) and the COG functional category (B).
